# Supplementary material
Source: PubMed Central journal article supplement (PMC5654656)
Supplement: NIHMS903787-supplement-1.pdf [file NIHMS903787-supplement-1.pdf]

## Supplemental Tables

### CD151 expression promotes a hyperproliferative T cell phenotype

Lillian Seu, Christopher Tidwell, Laura Timares, Alexandra Duverger, Frederic H. Wagner, Paul A. Goepfert, Andrew Westfall, Steffanie Sabbaj, Olaf Kutsch

Department of Medicine, University of Alabama at Birmingham, Birmingham, Alabama

The following tables provide the kinome array data used for GO-motif analysis and the generation of the presented protein-protein interaction networks.

Supplemental Table I: Baseline differences in the protein networks of CD151- and CD151+ T cells

| Antibody Codes | Target Protein Name | Phospho Site (Human) | Full Target Protein Name | CD151-                                                                  | CD151+ | Z-ratio | Uniprot Link | Phosphorylation        | MAPK cascade | Cell death | Cell proliferation |
|----------------|---------------------|----------------------|--------------------------|-------------------------------------------------------------------------|--------|---------|--------------|------------------------|--------------|------------|--------------------|
| 1              | PK154               | IKKa                 | T23                      | Inhibitor of NF-kappa-B protein-serine kinase alpha (CHUK)              | 3160   | 864     | -3.86        | <a href="#">Q15111</a> |              |            |                    |
| 2              | PK050               | MEK2 mouse           | T394                     | MAPK/ERK protein-serine kinase 2 (MKK2) (mouse)                         | 12581  | 3635    | -3.68        | <a href="#">P36507</a> |              |            |                    |
| 3              | NN038-1             | eIF2a                | Pan-specific             | Eukaryotic translation initiation factor 2 alpha                        | 4224   | 1571    | -2.92        | <a href="#">P05198</a> |              |            |                    |
| 4              | PK097-3             | PYK2                 | Y579                     | Protein-tyrosine kinase 2                                               | 1538   | 595     | -2.81        | <a href="#">Q14289</a> |              |            |                    |
| 5              | NK105-1             | MEK6                 | Pan-specific             | MAPK/ERK protein-serine kinase 6 (MKK6)                                 | 1402   | 547     | -2.79        | <a href="#">P52564</a> |              |            |                    |
| 6              | NP001               | CD45                 | Pan-specific             | Leukocyte common antigen CD45 receptor-tyrosine phosphatase (LCA, T200) | 2529   | 984     | -2.79        | <a href="#">P08575</a> |              |            |                    |
| 7              | PN162               | Catenin a            | S641                     | Catenin (cadherin-associated protein) alpha                             | 1476   | 590     | -2.71        | <a href="#">P35221</a> |              |            |                    |
| 8              | PK072-1             | Akt1 (PKBa)          | S473                     | RAC-alpha serine/threonine-protein kinase                               | 5885   | 2356    | -2.69        | <a href="#">P31749</a> |              |            |                    |
| 9              | PK020-3             | FAK                  | S722                     | Focal adhesion protein-tyrosine kinase                                  | 2531   | 1043    | -2.61        | <a href="#">Q06397</a> |              |            |                    |
| 10             | PN114               | 4E-BP1               | T45                      | Eukaryotic translation initiation factor 4E binding protein 1 (PHAS1)   | 1865   | 771     | -2.61        | <a href="#">Q13541</a> |              |            |                    |
| 11             | PK162               | Chk1                 | S280                     | Checkpoint protein-serine kinase 1                                      | 3220   | 1340    | -2.58        | <a href="#">Q14757</a> |              |            |                    |
| 12             | NN013               | Caspase 3            | Pan-specific             | Caspase 3 (apoptain, cysteine protease CPP32)                           | 1125   | 471     | -2.58        | <a href="#">P42574</a> |              |            |                    |
| 13             | PN188               | HDAC5                | S498                     | Histone deacetylase 5                                                   | 1972   | 830     | -2.55        | <a href="#">Q9UOL6</a> |              |            |                    |
| 14             | PK049               | MEK2                 | T394                     | MAPK/ERK protein-serine kinase 2 (MKK2)                                 | 2211   | 988     | -2.37        | <a href="#">P36507</a> |              |            |                    |
| 15             | NK079               | Insulin Recept       | Pan-specific             | Insulin receptor beta chain                                             | 872    | 398     | -2.32        | <a href="#">P06213</a> |              |            |                    |
| 16             | NN108               | STH1                 | Pan-specific             | Stress induced phosphoprotein 1 (Hsc70/Hsp90 organizing protein (Hop))  | 1527   | 708     | -2.26        | <a href="#">P31948</a> |              |            |                    |
| 17             | NN006-1             | BCL                  | Pan-specific             | B-cell lymphoma protein 2 alpha                                         | 975    | 456     | -2.24        | <a href="#">P10415</a> |              |            |                    |
| 18             | PK049-2             | MEK2 human           | T394                     | MAPK/ERK protein-serine kinase 2 (MKK2)                                 | 2502   | 1167    | -2.24        | <a href="#">P36507</a> |              |            |                    |
| 19             | NN023               | Cdc34                | Pan-specific             | Cell division cycle 34 (ubiquitin-conjugating ligase)                   | 3224   | 1737    | -1.79        | <a href="#">P49427</a> |              |            |                    |
| 20             | NN098               | SOD (Cu/Zn)          | Pan-specific             | Superoxide dismutase 1                                                  | 1990   | 1089    | -1.75        | <a href="#">Q8ND84</a> |              |            |                    |
| 21             | NK140               | PKCt                 | Pan-specific             | Protein-serine kinase C theta                                           | 1704   | 938     | -1.74        | <a href="#">Q04759</a> |              |            |                    |
| 22             | NN021               | Catenin b            | Pan-specific             | Catenin (cadherin-associated protein) beta 1                            | 24504  | 13673   | -1.67        | <a href="#">P35222</a> |              |            |                    |
| 23             | NK102               | MEK3b                | Pan-specific             | MAPK/ERK protein-serine kinase 3 beta isoform (MKK3 beta)               | 928    | 526     | -1.65        | <a href="#">P46734</a> |              |            |                    |
| 24             | PN159               | p53                  | S37                      | Tumor suppressor protein p53 (antigenNY-CO-13)                          | 5247   | 2980    | -1.63        | <a href="#">P04637</a> |              |            |                    |
| 25             | NK099-1             | MEK1                 | Pan-specific             | MAPK/ERK protein-serine kinase 1 (MKK1)                                 | 1698   | 988     | -1.57        | <a href="#">Q02750</a> |              |            |                    |
| 26             | NN162               | Jun                  | Pan-specific             | Jun proto-oncogene-encoded AP1 transcription factor                     | 1314   | 768     | -1.56        | <a href="#">P05412</a> |              |            |                    |
| 27             | NN102-NN124         | STAT1                | Pan-specific             | Signal transducer and activator of transcription 1 alpha                | 10892  | 6371    | -1.53        | <a href="#">P42224</a> |              |            |                    |
| 28             | NK025-2             | CDK1                 | Pan-specific             | Cyclin-dependent protein-serine kinase 1                                | 2666   | 1590    | -1.49        | <a href="#">P06493</a> |              |            |                    |
| 29             | NN110               | TRADD                | Pan-specific             | Tumor necrosis factor receptor type 1 associated DEATH domain protein   | 1533   | 917     | -1.49        | <a href="#">Q15628</a> |              |            |                    |
| 30             | PN115               | ATF2                 | S94/S112                 | Activating transcription factor 2 (CRE-BP1)                             | 2146   | 1287    | -1.47        | <a href="#">P15336</a> |              |            |                    |
| 31             | PK165               | CDK6                 | Y13                      | Cyclin-dependent protein-serine kinase 6                                | 1145   | 689     | -1.47        | <a href="#">Q00534</a> |              |            |                    |
| 32             | PK093-1             | PKCm (PKD)           | S916                     | Protein-serine kinase C mu (Protein kinase D)                           | 9105   | 5520    | -1.42        | <a href="#">P15139</a> |              |            |                    |
| 33             | PN171               | c-Cbl                | Y700                     | Signal transduction protein CBL                                         | 1043   | 639     | -1.41        | <a href="#">P22681</a> |              |            |                    |
| 34             | PK072-3             | Akt1 (PKBa)          | S473                     | RAC-alpha serine/threonine-protein kinase                               | 1275   | 783     | -1.40        | <a href="#">P31749</a> |              |            |                    |
| 35             | NK141               | PKCz                 | Pan-specific             | Protein-serine kinase C zeta                                            | 8662   | 5320    | -1.38        | <a href="#">Q05513</a> |              |            |                    |
| 36             | NN083               | p107                 | Pan-specific             | Retinoblastoma (Rb) protein-related p107 (PRB1)                         | 3979   | 2495    | -1.33        | <a href="#">P28749</a> |              |            |                    |
| 37             | PK143               | ASK1                 | S966                     | Apoptosis signal regulating protein-serine kinase 1                     | 1131   | 722     | -1.29        | <a href="#">Q59GL6</a> |              |            |                    |
| 38             | PN057-2             | p53                  | S392                     | Tumor suppressor protein p53 (antigenNY-CO-13)                          | 2082   | 1328    | -1.29        | <a href="#">P04637</a> |              |            |                    |
| 39             | NP004               | KAP                  | Pan-specific             | Cyclin-dependent kinase associated phosphatase (CDK inhibitor 3, CIP2)  | 22327  | 14155   | -1.28        | <a href="#">Q16667</a> |              |            |                    |
| 40             | PN082-1             | STAT3                | Y704                     | Signal transducer and activator of transcription 3                      | 7204   | 4587    | -1.28        | <a href="#">P40763</a> |              |            |                    |
| 41             | NN095               | Smac/DIABLO          | Pan-specific             | Second mitochondria-derived activator of caspase                        | 1049   | 675     | -1.27        | <a href="#">Q8NR28</a> |              |            |                    |
| 42             | PN143               | PLCg2                | Y753                     | 1-phosphatidylinositol-4,5-bisphosphate phosphodiesterase gamma-2       | 1565   | 1014    | -1.24        | <a href="#">P16885</a> |              |            |                    |
| 43             | PN164               | IkBa                 | Y42                      | Inhibitor of NF-kappa-B alpha (MAD3)                                    | 493    | 324     | -1.21        | <a href="#">P25963</a> |              |            |                    |
| 44             | PK663               | InsR                 | Y1189                    | INSR insulin receptor                                                   | 3910   | 2558    | -1.20        | <a href="#">P06213</a> |              |            |                    |
| 45             | NK101-3             | MEK3                 | Pan-specific             | MAPK/ERK protein-serine kinase 3 beta isoform (MKK3 beta)               | 13267  | 8677    | -1.19        | <a href="#">P46734</a> |              |            |                    |
| 46             | NK249-2             | SIK2                 | Pan-specific             | Serine/threonine-protein kinase SIK2                                    | 22760  | 14927   | -1.17        | <a href="#">Q9H0K1</a> |              |            |                    |
| 47             | NN104               | STAT3                | Pan-specific             | Signal transducer and activator of transcription 3                      | 6358   | 4207    | -1.16        | <a href="#">P40763</a> |              |            |                    |
| 48             | PK089-1             | PKCt                 | S676                     | Protein-serine kinase C theta                                           | 1329   | 886     | -1.16        | <a href="#">Q04759</a> |              |            |                    |
| 49             | PN166               | Catenin b            | S33                      | Catenin (cadherin-associated protein) beta 1                            | 1484   | 990     | -1.15        | <a href="#">P35222</a> |              |            |                    |
| 50             | PK090-1             | PKCt                 | S695                     | Protein-serine kinase C theta                                           | 1272   | 850     | -1.15        | <a href="#">Q04759</a> |              |            |                    |
| 51             | PN079-PM136         | STAT1                | Y701                     | Signal transducer and activator of transcription 1 alpha                | 3512   | 2343    | -1.14        | <a href="#">P42224</a> |              |            |                    |
| 52             | PN101-2             | Histone H3           | T3                       | Histone H3.3                                                            | 5549   | 3718    | -1.12        | <a href="#">P84243</a> |              |            |                    |
| 53             | NN121               | Arrestin b           | Pan-specific             | Arrestin beta 1                                                         | 1986   | 1350    | -1.09        | <a href="#">P49407</a> |              |            |                    |
| 54             | NP018               | PP2Cd                | Pan-specific             | Protein-serine phosphatase 2C - catalytic subunit - delta isoform       | 1136   | 777     | -1.08        | <a href="#">Q15297</a> |              |            |                    |
| 55             | PK055-1             | Met                  | T330/Y1234/Y12           | Hepatocyte growth factor (HGF) receptor-tyrosine kinase                 | 1384   | 948     | -1.07        | <a href="#">P08581</a> |              |            |                    |
| 56             | PN078-PM135         | STAT1                | S727                     | Signal transducer and activator of transcription 1 alpha                | 1752   | 1201    | -1.07        | <a href="#">P42224</a> |              |            |                    |
| 57             | PK072-5             | Akt1 (PKBa)          | S473                     | RAC-alpha serine/threonine-protein kinase                               | 10007  | 6836    | -1.06        | <a href="#">P31749</a> |              |            |                    |
| 58             | PK158               | RSK1                 | T348                     | Ribosomal S6 protein-serine kinase 1                                    | 3002   | 2065    | -1.05        | <a href="#">Q15418</a> |              |            |                    |
| 59             | PN009               | B23 (NPM)            | T234/237                 | B23 (nucleophosmin, numatrin, nucleolar protein NO38)                   | 1682   | 1169    | -1.03        | <a href="#">Q06748</a> |              |            |                    |
| 60             | NK027               | CDK4                 | Pan-specific             | Cyclin-dependent protein-serine kinase 4                                | 21337  | 14729   | -1.02        | <a href="#">P11802</a> |              |            |                    |
| 61             | PK152               | IGF1R                | Y1280                    | Insulin-like growth factor 1 receptor protein-tyrosine kinase           | 4019   | 2799    | -1.01        | <a href="#">P08069</a> |              |            |                    |
| 62             | PK122-1             | EGFR                 | Y1068                    | Epidermal growth factor receptor-tyrosine kinase                        | 2221   | 1553    | -1.00        | <a href="#">P00533</a> |              |            |                    |
| 63             | PK079-1             | PKCd                 | S645                     | Protein-serine kinase C delta                                           | 2709   | 3667    | 1.01         | <a href="#">Q05655</a> |              |            |                    |
| 64             | NN153               | KDEL Recept          | Pan-specific             | ER lumen protein retaining receptor 1                                   | 5389   | 7308    | 1.03         | <a href="#">P24390</a> |              |            |                    |
| 65             | PK101-2             | RSK1/2               | S380/S386                | Ribosomal S6 protein-serine kinase 1/2                                  | 1831   | 2549    | 1.09         | <a href="#">Q15418</a> |              |            |                    |
| 66             | NN141-1             | PDI                  | Pan-specific             | Protein disulfide-isomerase                                             | 21029  | 29083   | 1.10         | <a href="#">P07237</a> |              |            |                    |
| 67             | PN116               | BRCa1                | S1423                    | Breast cancer type 1 susceptibility protein                             | 2969   | 4147    | 1.11         | <a href="#">P38398</a> |              |            |                    |
| 68             | NN166               | 4E-BP1               | Pan-specific             | Eukaryotic translation initiation factor 4E binding protein 1 (PHAS1)   | 770    | 1095    | 1.15         | <a href="#">Q13541</a> |              |            |                    |
| 69             | NK150               | B-Raf                | Pan-specific             | RafB proto-oncogene-encoded protein-serine kinase                       | 7108   | 10093   | 1.17         | <a href="#">P15056</a> |              |            |                    |
| 70             | NK099-8             | MEK1                 | Pan-specific             | MAPK/ERK protein-serine kinase 1 (MKK1)                                 | 28486  | 40417   | 1.18         | <a href="#">Q02750</a> |              |            |                    |
| 71             | PN022-2             | Cortactin            | Y466                     | Cortactin (amplixin) (mouse)                                            | 3301   | 4752    | 1.20         | <a href="#">Q14247</a> |              |            |                    |
| 72             | PN041               | Hsp27                | S78                      | Heat shock 27 kDa protein beta 1 (HspB1)                                | 13085  | 18808   | 1.21         | <a href="#">Q04792</a> |              |            |                    |
| 73             | PK587               | CSF1R                | Y699                     | Macrophage colony-stimulating factor 1 receptor                         | 1216   | 1772    | 1.23         | <a href="#">P07333</a> |              |            |                    |
| 74             | NN028               | Cyclin A             | Pan-specific             | Cyclin A1                                                               | 25347  | 36646   | 1.24         | <a href="#">P78396</a> |              |            |                    |
| 75             | PN051-1             | MLC                  | S19                      | Myosin regulatory light chain 2, smooth muscle isoform                  | 6578   | 9620    | 1.26         | <a href="#">P19105</a> |              |            |                    |
| 76             | PK549               | BRSK1                | T189                     | BR serine/threonine-protein kinase 1                                    | 3830   | 5676    | 1.29         | <a href="#">Q8TDC3</a> |              |            |                    |
| 77             | PN036               | Histone H2A.X        | S139                     | Histone H2A variant X                                                   | 894    | 1351    | 1.34         | <a href="#">P16104</a> |              |            |                    |
| 78             | PK732               | Nek2                 | S171                     | NIMA (never-in-mitosis)-related protein-serine kinase 2                 | 17408  | 26052   | 1.34         | <a href="#">P51955</a> |              |            |                    |
| 79             | NN075               | NTSE                 | Pan-specific             | Ecto-5'-nucleotidase (CD73 antigen)                                     | 5838   | 8787    | 1.34         | <a href="#">P21589</a> |              |            |                    |
| 80             | PK867               | ERK1                 | S74                      | Extracellular regulated protein-serine kinase 1 (p44 MAP kinase)        | 5451   | 8341    | 1.39         | <a href="#">P27361</a> |              |            |                    |
| 81             | NN136-2             | Calnexin             | Pan-specific             | Calnexin                                                                | 29173  | 44503   | 1.40         | <a href="#">P27824</a> |              |            |                    |
| 82             | NN080               | p27 Kip1             | Pan-specific             | p27 cyclin-dependent kinase inhibitor 1B                                | 5231   | 8101    | 1.43         | <a href="#">P48627</a> |              |            |                    |
| 83             | NK227-2             | LKB1                 | Pan-specific             | Serine/threonine-protein kinase 11                                      | 22829  | 35307   | 1.44         | <a href="#">Q15831</a> |              |            |                    |
| 84             | NK137               | PKCg                 | Pan-specific             | Protein-serine kinase C gamma                                           | 9980   | 15512   | 1.45         | <a href="#">P05129</a> |              |            |                    |
| 85             | NK181-4             | TYK2                 | Pan-specific             | Protein-tyrosine kinase 2 (Jak-related)                                 | 27398  | 43928   | 1.55         | <a href="#">P28597</a> |              |            |                    |
| 86             | PN028-1             | eIF2a                | S52                      | Eukaryotic translation initiation factor 2 alpha                        | 3192   | 5218    | 1.59         | <a href="#">P05198</a> |              |            |                    |
| 87             | NN030-1             | Cyclin D1            | Pan-specific             | Cyclin D1 (PRAD1)                                                       | 9954   | 16296   | 1.61         | <a href="#">P24385</a> |              |            |                    |
| 88             | NN131               | I2PP2A (PHAF)        | Pan-specific             | Protein SET                                                             | 17650  | 28878   | 1.61         | <a href="#">Q01105</a> |              |            |                    |
| 89             | PN049-PM112-2       | MAPKAPK2             | T334                     | Mitogen-activated protein kinase-activated protein kinase 2 alpha       | 1402   | 2354    | 1.66         | <a href="#">P49137</a> |              |            |                    |
| 90             | NN149-2             | Crystallin aB        | Pan-specific             | Crystallin alpha B (heat-shock 20 kDa like-protein)                     | 3925   | 6599    | 1.68         | <a href="#">P02511</a> |              |            |                    |
| 91             | PN003-PM004         | Adducin a/g          | S662                     | Adducin alpha (ADD1)                                                    | 3710   | 6251    | 1.68         | <a href="#">P35611</a> |              |            |                    |
| 92             | NK136-2             | PKCe                 | Pan-specific             | Protein-serine kinase C epsilon                                         | 4913   | 8314    | 1.70         | <a href="#">Q02156</a> |              |            |                    |
| 93             | NK022               | CaMKK                | Pan-specific             | Calcium/calmodulin-dependent protein-serine kinase kinase               | 4886   | 8350    | 1.73         | <a href="#">Q8N5S9</a> |              |            |                    |
| 94             | PK102               | RSK1/2/3             | T573                     | Ribosomal S6 protein-serine kinase 1/2/3                                | 315    | 560     | 1.82         | <a href="#">Q15418</a> |              |            |                    |
| 95             | NK019-2             | CAMK2d               | Pan-specific             | Calcium/calmodulin-dependent protein-serine kinase 2 delta              | 2324   | 4156    | 1.86         | <a href="#">Q13557</a> |              |            |                    |
| 96             | NK014               | Btk                  | Pan-specific             | Bru-1's agammaglobulinemia tyrosine kinase                              | 10228  | 18418   | 1.90         | <a href="#">Q06187</a> |              |            |                    |
| 97             | PK073               | PKCa                 | S657                     | Protein-serine kinase C alpha                                           | 3917   | 7650    | 2.13         | <a href="#">P17262</a> |              |            |                    |
| 98             | NK135               | PKCd                 | Pan-specific             | Protein-serine kinase C delta                                           | 6982   | 13787   | 2.17         | <a href="#">Q05655</a> |              |            |                    |
| 99             | PN155               | Jun                  | Y170                     | Jun proto-oncogene-encoded AP1 transcription factor                     | 672    | 1458    | 2.43         | <a href="#">P05412</a> |              |            |                    |
| 100            | NN155               | MEF-2                | Pan-specific             | Myelin expression factor 2 (MYEF2)                                      | 5073   | 11199   | 2.51         | <a href="#">Q9P2K5</a> |              |            |                    |
| 101            | PK100-2             | RSK1/2               | S363/S369                | Ribosomal S6 protein-serine kinase 1/2                                  | 1208   | 2782    | 2.62         | <a href="#">Q15418</a> |              |            |                    |
| 102            | NK120-2             | p38a (MAPK 1)        | S363/S369                | Mitogen-activated protein-serine kinase p38 alpha                       | 11425  | 26141   | 2.63         | <a href="#">Q16539</a> |              |            |                    |
| 103            | PK075-2             | PKCb1/2              | T500                     | Protein-serine kinase C beta 1/2                                        | 913    | 2490    | 3.14         | <a href="#">P05771</a> |              |            |                    |
| 104            | PN030-2             | eIF4E                | S209                     | Eukaryotic translation initiation factor 4 (mRNA cap binding protein)   | 500    | 1531    | 3.48         | <a href="#">P06730</a> |              |            |                    |

Supplemental Table II: Proteins that are differentially regulated in response to IL-2 in CD151- CD4+ T cells

| Serial No. | Antibody Codes | Target Protein Name | Phospho Site (Human) | Full Target Protein Name | CD151-                                                                          | CD151+ IL-2 | Z-ratio | Uniprot Link | Phosphorylation        | MAPK cascade | Cell death | Cell proliferation |
|------------|----------------|---------------------|----------------------|--------------------------|---------------------------------------------------------------------------------|-------------|---------|--------------|------------------------|--------------|------------|--------------------|
| 1          | 174            | PN023               | CREB1                | S129/S133                | cAMP response element binding protein 1                                         | 3469        | 233     | -2.81        | <a href="#">P16220</a> |              |            |                    |
| 2          | 435            | PN154               | Jun                  | S243                     | Jun proto-oncogene-encoded AP1 transcription factor                             | 568         | 51      | -2.46        | <a href="#">P05412</a> |              |            |                    |
| 3          | 321            | PN196               | GATA1                | S142                     | Erythroid transcription factor                                                  | 711         | 105     | -1.96        | <a href="#">P15976</a> |              |            |                    |
| 4          | 137            | NK026-7             | CDK2                 | Pan-specific             | Cyclin-dependent protein-serine kinase 2                                        | 12506       | 2560    | -1.69        | <a href="#">P24941</a> |              |            |                    |
| 5          | 62             | NN006-1             | BCL                  | Pan-specific             | B-cell lymphoma protein 2 alpha                                                 | 975         | 220     | -1.53        | <a href="#">P10416</a> |              |            |                    |
| 6          | 242            | PN172               | eIF4B                | S422                     | Eukaryotic translation initiation factor 4B                                     | 1722        | 404     | -1.50        | <a href="#">P23598</a> |              |            |                    |
| 7          | 3              | PN114               | 4E-BP1               | T45                      | Eukaryotic translation initiation factor 4E binding protein 1 (PHAS1)           | 1865        | 486     | -1.39        | <a href="#">Q13541</a> |              |            |                    |
| 8          | 154            | PK162               | Chk1                 | S280                     | Checkpoint protein-serine kinase 1                                              | 3220        | 875     | -1.36        | <a href="#">Q14767</a> |              |            |                    |
| 9          | 701            | PN062               | PRAS40               | T246                     | Proline-rich Akt substrate 40 kDa (Akt1S1)                                      | 2041        | 588     | -1.29        | <a href="#">Q96B36</a> |              |            |                    |
| 10         | 729            | PN064               | Rad17                | S645                     | Rad17 homolog                                                                   | 1207        | 343     | -1.29        | <a href="#">Q75943</a> |              |            |                    |
| 11         | 354            | NN054               | Hsc70                | Pan-specific             | Heat shock 70 kDa protein 8                                                     | 8558        | 2595    | -1.28        | <a href="#">P33778</a> |              |            |                    |
| 12         | 728            | PN063               | Rac1/cdc42           | S71                      | Ras-related C3 botulinum toxin substrate 1                                      | 627         | 185     | -1.24        | <a href="#">P63000</a> |              |            |                    |
| 13         | 813            | NN105               | STAT5A               | Pan-specific             | Signal transducer and activator of transcription 5A                             | 21244       | 7007    | -1.21        | <a href="#">P42229</a> |              |            |                    |
| 14         | 123            | NN023               | Cdc34                | Pan-specific             | Cell division cycle 34 (ubiquitin-conjugating ligase)                           | 3224        | 1037    | -1.19        | <a href="#">P49427</a> |              |            |                    |
| 15         | 817            | NN108               | ST11                 | Pan-specific             | Stress induced phosphoprotein 1 (Hsc70/Hsp90 organizing protein (Hop))          | 1527        | 481     | -1.19        | <a href="#">P31948</a> |              |            |                    |
| 16         | 695            | NP018               | PP2Cd                | Pan-specific             | Protein-serine phosphatase 2C - catalytic subunit - delta isoform               | 1136        | 364     | -1.17        | <a href="#">Q15297</a> |              |            |                    |
| 17         | 166            | PN019               | Cofilin 1            | S3                       | Cofilin 1                                                                       | 1603        | 523     | -1.16        | <a href="#">P23528</a> |              |            |                    |
| 18         | 513            | PK055-1             | Met                  | Y1230/Y1234/N            | Hepatocyte growth factor (HGF) receptor-tyrosine kinase                         | 1384        | 451     | -1.15        | <a href="#">P08581</a> |              |            |                    |
| 19         | 428            | NK217               | JNK1                 | Pan-specific             | Jun N-terminus protein-serine kinase (stress-activated protein kinase (SAPK)) 1 | 1062        | 350     | -1.14        | <a href="#">P45983</a> |              |            |                    |
| 20         | 854            | PK133               | VEGFR2               | Y1214                    | Vascular endothelial growth factor receptor-tyrosine kinase 2 (Flk1)            | 1321        | 436     | -1.14        | <a href="#">P35968</a> |              |            |                    |
| 21         | 47             | PN115               | ATF2                 | S94/S112                 | Activating transcription factor 2 (CRE-BP1)                                     | 2146        | 727     | -1.13        | <a href="#">P15336</a> |              |            |                    |
| 22         | 725            | PK097-3             | PYK2                 | Y579                     | Protein-tyrosine kinase 2                                                       | 1538        | 516     | -1.13        | <a href="#">Q14289</a> |              |            |                    |
| 23         | 250            | PN170               | Elk1                 | S389                     | ETS domain-containing protein Elk-1                                             | 1241        | 417     | -1.12        | <a href="#">P19419</a> |              |            |                    |
| 24         | 58             | PN009               | B23 (NPM)            | T234/237                 | B23 (nucleophosmin, numatrin, nucleolar protein NO38)                           | 1682        | 586     | -1.09        | <a href="#">P06748</a> |              |            |                    |
| 25         | 610            | NK200-2             | PAKq                 | Pan-specific             | p21-activated kinase 2 (gamma) (serine/threonine-protein kinase PAK 2)          | 11133       | 4059    | -1.09        | <a href="#">Q13177</a> |              |            |                    |
| 26         | 760            | PK157               | RSK1                 | S352                     | Ribosomal S6 protein-serine kinase 1                                            | 2104        | 739     | -1.09        | <a href="#">Q15418</a> |              |            |                    |
| 27         | 434            | NN162               | Jun                  | Pan-specific             | Jun proto-oncogene-encoded AP1 transcription factor                             | 1314        | 460     | -1.08        | <a href="#">P05412</a> |              |            |                    |
| 28         | 132            | PK008-1             | CDK1/CDC2            | T161                     | Cyclin-dependent protein-serine kinase 1/2                                      | 1167        | 424     | -1.04        | <a href="#">P06493</a> |              |            |                    |
| 29         | 606            | PK061               | PAK1/2/3             | S144/S141/S15            | p21-activated kinase 1 (alpha) (serine/threonine-protein kinase PAK 1)          | 1177        | 429     | -1.03        | <a href="#">Q13153</a> |              |            |                    |
| 30         | 455            | PK041               | Lck                  | Y505                     | Lymphocyte-specific protein-tyrosine kinase                                     | 2058        | 786     | -1.00        | <a href="#">P06239</a> |              |            |                    |
| 31         | 652            | NK135               | PKCd                 | Pan-specific             | Protein-serine kinase C delta                                                   | 6982        | 12572   | 1.01         | <a href="#">Q05655</a> |              |            |                    |
| 32         | 650            | PK075-2             | PKCb1/2              | T500                     | Protein-serine kinase C beta 1/2                                                | 913         | 1597    | 1.04         | <a href="#">P05771</a> |              |            |                    |
| 33         | 361            | PN041               | Hsp27                | S78                      | Heat shock 27 kDa protein beta 1 (HspB1)                                        | 13085       | 24743   | 1.07         | <a href="#">P04792</a> |              |            |                    |
| 34         | 175            | PN024               | CREB1                | S133                     | cAMP response element binding protein 1                                         | 28402       | 55552   | 1.09         | <a href="#">P16220</a> |              |            |                    |
| 35         | 765            | PK101-2             | RSK1/2               | S380/S386                | Ribosomal S6 protein-serine kinase 1/2                                          | 1831        | 3410    | 1.13         | <a href="#">Q15418</a> |              |            |                    |
| 36         | 764            | PK100-2             | RSK1/2               | S363/S369                | Ribosomal S6 protein-serine kinase 1/2                                          | 1208        | 2262    | 1.15         | <a href="#">Q15418</a> |              |            |                    |
| 37         | 458            | NK227-2             | LKB1                 | Pan-specific             | Serine/threonine-protein kinase 11                                              | 22829       | 46279   | 1.17         | <a href="#">Q15831</a> |              |            |                    |
| 38         | 93             | NK022               | CaMKK                | Pan-specific             | Calcium/calmodulin-dependent protein-serine kinase kinase                       | 4886        | 9956    | 1.24         | <a href="#">Q8N559</a> |              |            |                    |
| 39         | 78             | PN116               | BRCA1                | S1423                    | Breast cancer type 1 susceptibility protein                                     | 2969        | 6047    | 1.27         | <a href="#">P38398</a> |              |            |                    |
| 40         | 459            | NK227-3             | LKB1                 | Pan-specific             | Serine/threonine-protein kinase 11                                              | 38399       | 84264   | 1.29         | <a href="#">Q15831</a> |              |            |                    |
| 41         | 203            | NP006-2             | DUSP1 (MKP1)         | Pan-specific             | MAP kinase phosphatase 1 (CL100, VH1)                                           | 30957       | 69448   | 1.34         | <a href="#">P28562</a> |              |            |                    |
| 42         | 763            | PK100               | RSK1/2               | S363/S369                | Ribosomal S6 protein-serine kinase 1/2                                          | 2153        | 4525    | 1.34         | <a href="#">Q15418</a> |              |            |                    |
| 43         | 470            | NN155               | MEF-2                | Pan-specific             | Myelin expression factor 2 (MYEF2)                                              | 5073        | 11024   | 1.36         | <a href="#">Q9P2K5</a> |              |            |                    |
| 44         | 74             | NK156-4             | B-Raf                | Pan-specific             | RafB proto-oncogene-encoded protein-serine kinase                               | 20719       | 47428   | 1.39         | <a href="#">P15056</a> |              |            |                    |
| 45         | 757            | NK163-3             | Ros                  | Pan-specific             | Orosomucoid 1 receptor-tyrosine kinase                                          | 26933       | 62397   | 1.40         | <a href="#">P08922</a> |              |            |                    |
| 46         | 265            | NK055-2             | ERK1                 | Pan-specific             | Extracellular regulated protein-serine kinase 1 (p44 MAP kinase)                | 37157       | 88687   | 1.44         | <a href="#">P27361</a> |              |            |                    |
| 47         | 89             | NK019-2             | CAMK2d               | Pan-specific             | Calcium/calmodulin-dependent protein-serine kinase 2 delta                      | 2324        | 5252    | 1.46         | <a href="#">Q13557</a> |              |            |                    |
| 48         | 364            | NN057-3             | Hsp40                | Pan-specific             | DnaJ homolog, subfamily B member 1                                              | 18087       | 42856   | 1.46         | <a href="#">P25685</a> |              |            |                    |
| 49         | 852            | NN176               | VEGF-C               | Pan-specific             | Vascular endothelial growth factor C                                            | 5256        | 12440   | 1.51         | <a href="#">P49767</a> |              |            |                    |
| 50         | 847            | NK181-4             | TYK2                 | Pan-specific             | Protein-tyrosine kinase 2 (Jak-related)                                         | 27398       | 68594   | 1.54         | <a href="#">P29597</a> |              |            |                    |
| 51         | 84             | PN015               | Caldesmon            | S789                     | Caldesmon                                                                       | 3777        | 9038    | 1.55         | <a href="#">Q05682</a> |              |            |                    |
| 52         | 266            | NK055-3             | ERK1                 | Pan-specific             | Extracellular regulated protein-serine kinase 1 (p44 MAP kinase)                | 37206       | 94331   | 1.55         | <a href="#">P27361</a> |              |            |                    |
| 53         | 456            | NK093               | LIMK1                | Pan-specific             | LIM domain kinase 1                                                             | 4188        | 10057   | 1.55         | <a href="#">P53667</a> |              |            |                    |
| 54         | 474            | NK099-8             | MEK1                 | Pan-specific             | MAPK/ERK protein-serine kinase 1 (MKK1)                                         | 28486       | 71897   | 1.55         | <a href="#">Q02750</a> |              |            |                    |
| 55         | 846            | NK181-3             | TYK2                 | Pan-specific             | Protein-tyrosine kinase 2 (Jak-related)                                         | 30973       | 79263   | 1.57         | <a href="#">P29597</a> |              |            |                    |
| 56         | 647            | PK073               | PKCa                 | S657                     | Protein-serine kinase C alpha                                                   | 3917        | 9721    | 1.61         | <a href="#">P17252</a> |              |            |                    |
| 57         | 653            | PK079-1             | PKCd                 | S645                     | Protein-serine kinase C delta                                                   | 2709        | 6680    | 1.62         | <a href="#">Q05655</a> |              |            |                    |
| 58         | 758            | NK163-4             | Ros                  | Pan-specific             | Orosomucoid 1 receptor-tyrosine kinase                                          | 26710       | 71085   | 1.65         | <a href="#">P08922</a> |              |            |                    |
| 59         | 264            | NK055-1             | ERK1                 | Pan-specific             | Extracellular regulated protein-serine kinase 1 (p44 MAP kinase)                | 31582       | 88820   | 1.74         | <a href="#">P27361</a> |              |            |                    |
| 60         | 463            | PK044               | MAPKAPK2             | T222                     | Mitogen-activated protein kinase-activated protein kinase 2                     | 5182        | 14309   | 1.79         | <a href="#">P49137</a> |              |            |                    |
| 61         | 460            | NK227-4             | LKB1                 | Pan-specific             | Serine/threonine-protein kinase 11                                              | 29746       | 88318   | 1.84         | <a href="#">Q15831</a> |              |            |                    |
| 62         | 187            | PN190               | Cyclin B1            | S147                     | Cyclin B1                                                                       | 3137        | 10644   | 2.19         | <a href="#">P14635</a> |              |            |                    |
| 63         | 79             | PN014               | BRCA1                | S1497                    | Breast cancer type 1 susceptibility protein                                     | 6499        | 24876   | 2.37         | <a href="#">P38398</a> |              |            |                    |

Supplemental Table III: Proteins that are differentially regulated in response to IL-2 in CD151+ CD4+ T cells

| Serial No. | Antibody Codes | Target Protein Name | Phospho Site (Human) | Full Target Protein Name | CD151+                                                                           | CD151+<br>+IL-2 | Z-ratio | Uniprot Link | Phosphorylation | MAPK cascade | Cell death | Cell proliferation |
|------------|----------------|---------------------|----------------------|--------------------------|----------------------------------------------------------------------------------|-----------------|---------|--------------|-----------------|--------------|------------|--------------------|
| 1          | 174            | PN023               | CREB1                | S129/S133                | cAMP response element binding protein 1                                          | 4048            | 620     | -2.63        | P16220          |              |            |                    |
| 2          | 312            | PN195               | FKHR                 | S319                     | Forkhead box protein O1                                                          | 531             | 85      | -2.54        | Q12778          |              |            |                    |
| 3          | 245            | PN030-2             | eIF4E                | S209                     | Eukaryotic translation initiation factor 4 (mRNA cap binding protein)            | 1531            | 273     | -2.41        | P06730          |              |            |                    |
| 4          | 709            | PN104               | Progesterone R       | S294                     | Progesterone receptor                                                            | 623             | 122     | -2.27        | P06401          |              |            |                    |
| 5          | 137            | NK026-7             | CDK2                 | Pan-specific             | Cyclin-dependent protein-serine kinase 2                                         | 13424           | 3482    | -1.93        | P24941          |              |            |                    |
| 6          | 534            | NK111               | Mnk2                 | Pan-specific             | MAP kinase-interacting protein-serine kinase 2 (calmodulin-activated)            | 3973            | 1139    | -1.78        | Q9JHB9          |              |            |                    |
| 7          | 46             | PK143               | ASK1                 | S966                     | Apoptosis signal regulating protein-serine kinase 1                              | 722             | 206     | -1.76        | Q59GL6          |              |            |                    |
| 8          | 248            | NN168               | Elk1                 | Pan-specific             | ETS domain-containing protein Elk-1                                              | 940             | 269     | -1.76        | P19419          |              |            |                    |
| 9          | 701            | PN062               | PRAS40               | T246                     | Proline-rich Akt substrate 40 kDa (Akt1S1)                                       | 2057            | 604     | -1.74        | Q98B36          |              |            |                    |
| 10         | 97             | NN016               | Caspase 6            | Pan-specific             | Caspase 6 (apoptotic protease Mch2)                                              | 996             | 301     | -1.69        | P55212          |              |            |                    |
| 11         | 242            | PN172               | eIF4B                | S422                     | Eukaryotic translation initiation factor 4B                                      | 1664            | 516     | -1.66        | P23588          |              |            |                    |
| 12         | 439            | PN155               | Jun                  | Y170                     | Jun proto-oncogene-encoded AP1 transcription factor                              | 1458            | 455     | -1.65        | P05412          |              |            |                    |
| 13         | 143            | NK028-5             | CDK5                 | Pan-specific             | Cyclin-dependent protein-serine kinase 5                                         | 14047           | 4821    | -1.55        | Q00535          |              |            |                    |
| 14         | 729            | PN064               | Rad17                | S645                     | Rad17 homolog                                                                    | 1010            | 348     | -1.51        | Q75943          |              |            |                    |
| 15         | 250            | PN170               | Elk1                 | S389                     | ETS domain-containing protein Elk-1                                              | 1026            | 361     | -1.49        | P19419          |              |            |                    |
| 16         | 760            | PK157               | RSK1                 | S352                     | Ribosomal S6 protein-serine kinase 1                                             | 1860            | 682     | -1.44        | Q15418          |              |            |                    |
| 17         | 734            | NN093               | Rb                   | Pan-specific             | Retinoblastoma-associated protein 1                                              | 1724            | 633     | -1.43        | P06400          |              |            |                    |
| 18         | 147            | NK030-2             | CDK7                 | Pan-specific             | Cyclin-dependent protein-serine kinase 7                                         | 11993           | 4557    | -1.41        | P50613          |              |            |                    |
| 19         | 3              | PN114               | 4E-BP1               | T45                      | Eukaryotic translation initiation factor 4E binding protein 1 (PHAS1)            | 771             | 290     | -1.39        | Q13541          |              |            |                    |
| 20         | 548            | PN182               | MyoD                 | S200                     | Myoblast determination protein 1                                                 | 1038            | 394     | -1.38        | P15172          |              |            |                    |
| 21         | 66             | PK061               | PAK1/2/3             | S144/S141/S151           | p21-activated kinase 1 (alpha) (serine/threonine-protein kinase PAK 1)           | 1211            | 462     | -1.38        | Q13153          |              |            |                    |
| 22         | 106            | NK129               | Akt1 (PKBa)          | Pan-specific             | RAC-alpha serine/threonine-protein kinase                                        | 8129            | 3229    | -1.35        | P31749          |              |            |                    |
| 23         | 356            | NN055               | HSF4                 | Pan-specific             | Heat shock transcription factor 4                                                | 1272            | 501     | -1.33        | P84243          |              |            |                    |
| 24         | 683            | PN144               | PLCg1                | Y783                     | 1-phosphatidylinositol-4,5-bisphosphate phosphodiesterase gamma-1                | 521             | 206     | -1.32        | P19174          |              |            |                    |
| 25         | 428            | NK217               | JNK1                 | Pan-specific             | Jun N-terminus protein-serine kinase (stress-activated protein kinase (SAPK)) 1  | 995             | 400     | -1.30        | P45983          |              |            |                    |
| 26         | 829            | PN107               | Tau                  | S422                     | Microtubule-associated protein tau                                               | 2347            | 996     | -1.24        | P10836          |              |            |                    |
| 27         | 409            | PN118               | IRS1                 | S639                     | Insulin receptor substrate 1                                                     | 1455            | 619     | -1.23        | P35568          |              |            |                    |
| 28         | 451            | NK092-3             | Lck                  | Pan-specific             | Lymphocyte-specific protein-tyrosine kinase                                      | 985             | 421     | -1.22        | P06239          |              |            |                    |
| 29         | 183            | NK044               | Csk                  | Pan-specific             | C-terminus of Src tyrosine kinase                                                | 2111            | 911     | -1.22        | P41240          |              |            |                    |
| 30         | 860            | NP030               | VHR                  | Pan-specific             | Dual specificity protein phosphatase 3                                           | 1452            | 626     | -1.21        | P51452          |              |            |                    |
| 31         | 62             | NN006-1             | BCL                  | Pan-specific             | B-cell lymphoma protein 2 alpha                                                  | 456             | 195     | -1.21        | P10415          |              |            |                    |
| 32         | 354            | NN054               | Hsc70                | Pan-specific             | Heat shock 70 kDa protein 8                                                      | 8901            | 3934    | -1.20        | P33778          |              |            |                    |
| 33         | 63             | NN006               | Bcl2                 | Pan-specific             | B-cell lymphoma protein 2 alpha                                                  | 1830            | 803     | -1.19        | P10415          |              |            |                    |
| 34         | 560            | NK207               | NIK                  | Pan-specific             | NF-kappa beta-inducing kinase                                                    | 6037            | 2726    | -1.17        | Q96558          |              |            |                    |
| 35         | 435            | PN154               | Jun                  | S243                     | Jun proto-oncogene-encoded AP1 transcription factor                              | 567             | 252     | -1.16        | P05412          |              |            |                    |
| 36         | 193            | PN026               | Dab1                 | Y198                     | Disabled homolog 1                                                               | 2018            | 925     | -1.13        | Q75553          |              |            |                    |
| 37         | 824            | NK175-6             | TAK1                 | Pan-specific             | TGF-beta-activated protein-serine kinase 1                                       | 10455           | 4977    | -1.10        | Q43318          |              |            |                    |
| 38         | 126            | NK025-1             | CDK1                 | Pan-specific             | Cyclin-dependent protein-serine kinase 1                                         | 30090           | 14525   | -1.10        | P06493          |              |            |                    |
| 39         | 321            | PN196               | GATA1                | S142                     | Erythroid transcription factor                                                   | 606             | 284     | -1.09        | P15976          |              |            |                    |
| 40         | 497            | NK104               | MEK5                 | Pan-specific             | MAPK/ERK protein-serine kinase 5 (MKK5)                                          | 4343            | 2083    | -1.08        | Q13163          |              |            |                    |
| 41         | 538            | NK113-2             | MTS1                 | Pan-specific             | Mammalian STE20-like protein-serine kinase 1 (KRS2)                              | 949             | 451     | -1.08        | Q13043          |              |            |                    |
| 42         | 7              | NK001               | Abl                  | Pan-specific             | Abelson proto-oncogene-encoded protein-tyrosine kinase                           | 1663            | 806     | -1.05        | P00519          |              |            |                    |
| 43         | 311            | PN194               | FKHR                 | S256                     | Forkhead box protein O1                                                          | 707             | 340     | -1.05        | Q12778          |              |            |                    |
| 44         | 681            | PK132               | PKR1                 | T446                     | Double-stranded RNA-dependent protein-serine kinase                              | 780             | 382     | -1.03        | P19825          |              |            |                    |
| 45         | 871            | NK186-2             | Yes                  | Pan-specific             | Yamaguchi sarcoma proto-oncogene-encoded tyrosine kinase                         | 379             | 185     | -1.03        | Q07947          |              |            |                    |
| 46         | 632            | NN181-1             | PKD3                 | Pan-specific             | Pyruvate dehydrogenase kinase isoform 3                                          | 1968            | 975     | -1.03        | Q15120          |              |            |                    |
| 47         | 786            | PK102               | RSK1/2/3             | T573                     | Ribosomal S6 protein-serine kinase 1/2/3                                         | 550             | 276     | -1.02        | Q15418          |              |            |                    |
| 48         | 430            | NK088-2             | JNK2                 | Pan-specific             | Jun N-terminus protein-serine kinase (stress-activated protein kinase (SAPK)) 1  | 8767            | 4451    | -1.01        | P45983          |              |            |                    |
| 49         | 166            | PN019               | Cofilin 1            | S3                       | Cofilin 1                                                                        | 1748            | 879     | -1.01        | P23528          |              |            |                    |
| 50         | 92             | NK211               | CamK1                | Pan-specific             | Calcium/calmodulin-dependent protein-serine kinase 1 alpha                       | 5566            | 2848    | -1.00        | Q14012          |              |            |                    |
| 51         | 868            | NK254-1             | WNK3                 | Pan-specific             | Serine/threonine-protein kinase WNK3                                             | 28779           | 49415   | 1.02         | Q9BY97          |              |            |                    |
| 52         | 532            | NN132               | mMOB1                | Pan-specific             | Preimplantation protein 3                                                        | 24995           | 42906   | 1.02         | Q9Y3A3          |              |            |                    |
| 53         | 259            | NK231-2             | ErbB3                | Pan-specific             | Tyrosine kinase-type cell surface receptor HER3                                  | 38191           | 66123   | 1.03         | P21860          |              |            |                    |
| 54         | 544            | NK116-4             | mTOR                 | Pan-specific             | Mammalian target of rapamycin (FRAP)                                             | 30321           | 52429   | 1.03         | P42345          |              |            |                    |
| 55         | 255            | NK054-4             | ErbB2                | Pan-specific             | ErbB2 (Neu) receptor-tyrosine kinase                                             | 46335           | 80475   | 1.03         | P04626          |              |            |                    |
| 56         | 466            | PN050-1             | MARCKS               | S152/S156                | Myristoylated alanine-rich protein kinase C substrate                            | 639             | 1068    | 1.03         | P29066          |              |            |                    |
| 57         | 358            | NN152-1             | Hsp25                | Pan-specific             | Heat shock 27 kDa protein beta 1 (HspB1)                                         | 24508           | 42718   | 1.05         | P84243          |              |            |                    |
| 58         | 771            | PN161               | Shc1                 | Y349                     | SH2 domain-containing transforming protein 1                                     | 319             | 536     | 1.06         | P29353          |              |            |                    |
| 59         | 763            | PK100               | RSK1/2               | S363/S369                | Ribosomal S6 protein-serine kinase 1/2                                           | 2402            | 4119    | 1.06         | Q15418          |              |            |                    |
| 60         | 678            | NK203               | PKG1b-NT             | Pan-specific             | gGMP-dependent protein kinase 1, beta isozyme                                    | 3440            | 5927    | 1.07         | P14619          |              |            |                    |
| 61         | 836            | PK829               | TEC                  | Y519                     | Tyrosine-protein kinase Tec                                                      | 23469           | 41664   | 1.09         | P42680          |              |            |                    |
| 62         | 525            | NK105-6             | MKK6                 | Pan-specific             | MAPK/ERK protein-serine kinase 6 (MKK6)                                          | 27201           | 48394   | 1.10         | P52564          |              |            |                    |
| 63         | 706            | NK048-6             | PRKDC (DNAP)         | Pan-specific             | DNA-activated protein-serine kinase                                              | 33582           | 60844   | 1.13         | P78527          |              |            |                    |
| 64         | 301            | NK061               | Fes                  | Pan-specific             | Fes/Fps protein-tyrosine kinase                                                  | 3149            | 5586    | 1.13         | P07332          |              |            |                    |
| 65         | 167            | PN020               | Cofilin 2            | S3                       | Cofilin 2                                                                        | 9922            | 17790   | 1.13         | Q9Y281          |              |            |                    |
| 66         | 758            | NK163-4             | Ros                  | Pan-specific             | Orosomucoid 1 receptor-tyrosine kinase                                           | 31552           | 57335   | 1.14         | P08922          |              |            |                    |
| 67         | 855            | NK226-2             | VGFR1                | Pan-specific             | Vascular endothelial growth factor receptor 1                                    | 36700           | 66862   | 1.14         | P17948          |              |            |                    |
| 68         | 332            | NN049               | Gp94                 | Pan-specific             | Glucose regulated protein 94 (endoplasmic)                                       | 31855           | 52628   | 1.15         | P14825          |              |            |                    |
| 69         | 520            | NK103-4             | MKK4                 | Pan-specific             | MAPK/ERK protein-serine kinase 4 (MKK4)                                          | 29498           | 54033   | 1.16         | P45985          |              |            |                    |
| 70         | 786            | PN125               | SMC1                 | S957                     | Structural maintenance of chromosomes protein 1A                                 | 11481           | 20862   | 1.16         | Q14683          |              |            |                    |
| 71         | 577            | PK739               | p38a MAPK            | T180+pY182               | Mitogen-activated protein-serine kinase p38 alpha                                | 5450            | 9842    | 1.16         | Q16539          |              |            |                    |
| 72         | 442            | NK241-2             | Kit                  | Pan-specific             | Mast/stem cell growth factor receptor Kit                                        | 29913           | 55164   | 1.17         | P10721          |              |            |                    |
| 73         | 298            | PK629               | FAK                  | Y577                     | Focal adhesion protein-tyrosine kinase                                           | 3241            | 5914    | 1.19         | Q05307          |              |            |                    |
| 74         | 633            | NN181-2             | PKD3                 | Pan-specific             | Pyruvate dehydrogenase kinase isoform 3                                          | 30625           | 57664   | 1.22         | Q15120          |              |            |                    |
| 75         | 799            | NK172-2             | Src                  | Pan-specific             | Src proto-oncogene-encoded protein-tyrosine kinase                               | 26954           | 50923   | 1.23         | P12831          |              |            |                    |
| 76         | 847            | NK181-4             | TYK2                 | Pan-specific             | Protein-tyrosine kinase 2 (Jak-related)                                          | 43928           | 84730   | 1.26         | P29597          |              |            |                    |
| 77         | 699            | NP021               | PP5/PPT              | Pan-specific             | Protein-serine phosphatase 5 - catalytic subunit (PPT)                           | 388             | 716     | 1.26         | P53041          |              |            |                    |
| 78         | 83             | NN174               | CA9                  | Pan-specific             | Carbonic anhydrase 9                                                             | 5178            | 9838    | 1.27         | Q16790          |              |            |                    |
| 79         | 277            | NK056-4             | ERK2                 | Pan-specific             | Extracellular regulated protein-serine kinase 2 (p42 MAP kinase)                 | 32595           | 63025   | 1.27         | P28482          |              |            |                    |
| 80         | 757            | NK163-3             | Ros                  | Pan-specific             | Orosomucoid 1 receptor-tyrosine kinase                                           | 29192           | 56437   | 1.28         | P08922          |              |            |                    |
| 81         | 458            | NK227-2             | LKB1                 | Pan-specific             | Serine/threonine-protein kinase 11                                               | 35307           | 68527   | 1.28         | Q15831          |              |            |                    |
| 82         | 368            | NN059-3             | Hsp60                | Pan-specific             | Heat shock 60 kDa protein 1 (chaperonin, CPN60)                                  | 9800            | 18844   | 1.29         | P10809          |              |            |                    |
| 83         | 563            | PN054               | NMDAR2B              | Y1472                    | N-methyl-D-aspartate (NMDA) glutamate receptor 2B subunit                        | 586             | 1106    | 1.30         | Q13224          |              |            |                    |
| 84         | 302            | NK062-3             | FGFR1                | Pan-specific             | Fibroblast growth factor receptor-tyrosine kinase 1                              | 28267           | 55439   | 1.31         | P11362          |              |            |                    |
| 85         | 718            | NP024               | PTP1B                | Pan-specific             | Protein-tyrosine phosphatase 1B                                                  | 912             | 1748    | 1.33         | P18031          |              |            |                    |
| 86         | 647            | PK073               | PKCa                 | S657                     | Protein-serine kinase C alpha                                                    | 7650            | 15060   | 1.34         | P17252          |              |            |                    |
| 87         | 474            | NK099-8             | MEK1                 | Pan-specific             | MAPK/ERK protein-serine kinase 1 (MKK1)                                          | 40417           | 80986   | 1.35         | Q02750          |              |            |                    |
| 88         | 835            | PK828               | TBK1                 | S172                     | Serine/threonine-protein kinase TBK1                                             | 30087           | 62174   | 1.37         | Q9UHD2          |              |            |                    |
| 89         | 524            | NK105-4             | MKK6                 | Pan-specific             | MAPK/ERK protein-serine kinase 6 (MKK6)                                          | 23036           | 46473   | 1.37         | P52564          |              |            |                    |
| 90         | 395            | PK154               | IKKa                 | T23                      | Inhibitor of NF-kappa-B protein-serine kinase alpha (CHUK)                       | 864             | 1698    | 1.38         | Q15111          |              |            |                    |
| 91         | 331            | NN048-2             | Gp78                 | Pan-specific             | Glucose regulated protein 78                                                     | 22110           | 44787   | 1.38         | P11021          |              |            |                    |
| 92         | 113            | NP038-1             | Cdc25A               | Pan-specific             | Cell division cycle 25A phosphatase                                              | 26893           | 54702   | 1.39         | P30304          |              |            |                    |
| 93         | 473            | NK099-7             | MEK1                 | Pan-specific             | MAPK/ERK protein-serine kinase 1 (MKK1)                                          | 33131           | 68328   | 1.42         | Q02750          |              |            |                    |
| 94         | 39             | NK205-4             | A-Raf                | Pan-specific             | A-Raf proto-oncogene serine/threonine-protein kinase                             | 42433           | 87803   | 1.42         | P10398          |              |            |                    |
| 95         | 421            | NK086-2             | JAK3                 | Pan-specific             | Janus protein-tyrosine kinase 3                                                  | 29661           | 61255   | 1.42         | P52333          |              |            |                    |
| 96         | 265            | NK055-2             | ERK1                 | Pan-specific             | Extracellular regulated protein-serine kinase 1 (p44 MAP kinase)                 | 38943           | 80624   | 1.42         | P27361          |              |            |                    |
| 97         | 521            | NK103-5             | MKK4                 | Pan-specific             | MAPK/ERK protein-serine kinase 4 (MKK4)                                          | 31722           | 65589   | 1.42         | P45985          |              |            |                    |
| 98         | 273            | NK055-NK056-6       | ERK1/2               | Pan-specific             | Extracellular regulated protein-serine kinase 1 (p44 MAP kinase) + Extracellular | 28097           | 58082   | 1.42         | P27361          |              |            |                    |
| 99         | 275            | PK168-PK169         | ERK1/2               | Y204+Y187                | Extracellular regulated protein-serine kinase 1 (p44 MAP kinase) + Extracellular | 3650            | 7407    | 1.42         | P27361          |              |            |                    |
| 100        | 266            | NK055-3             | ERK1                 | Pan-specific             | Extracellular regulated protein-serine kinase 1 (p44 MAP kinase)                 | 40478           | 84042   | 1.43         | P27361          |              |            |                    |
| 101        | 460            | NK227-4             | LKB1                 | Pan-specific             | Serine/threonine-protein kinase 11                                               | 32026           | 71557   | 1.59         | Q15831          |              |            |                    |
| 102        | 865            | NK252-1             | WNK1                 | Pan-specific             | Serine/threonine-protein kinase WNK1                                             | 29843           | 70659   | 1.72         | Q9H4A3          |              |            |                    |
| 103        | 586            | NK059-1             | p38g MAPK            | Pan-specific             | Mitogen-activated protein-serine kinase p38 gamma (MAPK12)                       | 6962            | 16293   | 1.76         | P53778          |              |            |                    |
| 104        | 74             | NK156-4             | B-Raf                | Pan-specific             | RafB proto-oncogene-encoded protein-serine kinase                                | 25702           | 62781   | 1.79         | P15056          |              |            |                    |
| 105        | 463            | PK044               | MAPKAPK2             | T222                     | Mitogen-activated protein kinase-activated protein kinase 2                      | 4498            | 11048   | 1.84         | P49137          |              |            |                    |
| 106        | 377            | NN063               | HspB1                | Pan-specific             | Hsp70 binding protein 1                                                          | 4279            | 11476   | 2.03         | Q95351          |              |            |                    |
| 107        | 669            | PK087               | PKCI                 | T555/T563                | Protein-serine kinase C lambda/delta/iota                                        | 1091            | 2922    | 2.06         | P41743          |              |            |                    |
| 108        | 187            | PN190               | Cyclin B1            | S147                     | Cyclin B1                                                                        | 3702            | 10138   | 2.08         | P14835          |              |            |                    |
| 108        | 456            | NK093               | LMK1                 | Pan-specific             | LIM domain kinase 1                                                              | 3537            | 10571   | 2.27         | P53667          |              |            |                    |
| 109        | 79             | PN014               | BRCA1                | S1497                    | Bre                                                                              |                 |         |              |                 |              |            |                    |

Supplemental Table IV: Altered proteins that are shared by CD151- and CD151+ CD4+ T cells in response to IL-2 stimulation

| Serial No. | Antibody Codes | Target Protein Name | Phospho Site (Human) | Full Target Protein Name | CD151-                                                                          | CD151+ IL-2 | Z-ratio | CD151+ | CD151+ IL-2 | Z-ratio | Uniprot Link |                        |
|------------|----------------|---------------------|----------------------|--------------------------|---------------------------------------------------------------------------------|-------------|---------|--------|-------------|---------|--------------|------------------------|
| 1          | 174            | PN023               | CREB1                | S129/S133                | cAMP response element binding protein 1                                         | 3469        | 233     | -2.81  | 4048        | 620     | -2.63        | <a href="#">P16220</a> |
| 2          | 435            | PN154               | Jun                  | S243                     | Jun proto-oncogene-encoded AP1 transcription factor                             | 568         | 51      | -2.46  | 567         | 252     | -1.16        | <a href="#">P05412</a> |
| 3          | 321            | PN196               | GATA1                | S142                     | Erythroid transcription factor                                                  | 711         | 105     | -1.96  | 606         | 284     | -1.09        | <a href="#">P15976</a> |
| 4          | 62             | NN006-1             | BCL                  | Pan-specific             | B-cell lymphoma protein 2 alpha                                                 | 975         | 220     | -1.53  | 456         | 195     | -1.21        | <a href="#">P10415</a> |
| 5          | 242            | PN172               | eIF4B                | S422                     | Eukaryotic translation initiation factor 4B                                     | 1722        | 404     | -1.50  | 1664        | 516     | -1.66        | <a href="#">P23588</a> |
| 6          | 3              | PN114               | 4E-BP1               | T45                      | Eukaryotic translation initiation factor 4E binding protein 1 (PHAS1)           | 1865        | 486     | -1.39  | 771         | 290     | -1.39        | <a href="#">Q13541</a> |
| 7          | 701            | PN062               | PRAS40               | T246                     | Proline-rich Akt substrate 40 kDa (Akt1S1)                                      | 2041        | 588     | -1.29  | 2057        | 604     | -1.74        | <a href="#">Q96B36</a> |
| 8          | 729            | PN064               | Rad17                | S645                     | Rad17 homolog                                                                   | 1207        | 343     | -1.29  | 1010        | 348     | -1.51        | <a href="#">Q75943</a> |
| 9          | 354            | NN054               | Hsc70                | Pan-specific             | Heat shock 70 kDa protein 8                                                     | 8558        | 2595    | -1.28  | 8901        | 3934    | -1.20        | <a href="#">P33778</a> |
| 10         | 166            | PN019               | Cofilin 1            | S3                       | Cofilin 1                                                                       | 1603        | 523     | -1.16  | 1748        | 879     | -1.01        | <a href="#">P23528</a> |
| 11         | 428            | NK217               | JNK1                 | Pan-specific             | Jun N-terminus protein-serine kinase (stress-activated protein kinase (SAPK)) 1 | 1062        | 350     | -1.14  | 995         | 400     | -1.30        | <a href="#">P45983</a> |
| 12         | 250            | PN170               | Elk1                 | S389                     | ETS domain-containing protein Elk-1                                             | 1241        | 417     | -1.12  | 1026        | 361     | -1.49        | <a href="#">P19419</a> |
| 13         | 760            | PK157               | RSK1                 | S352                     | Ribosomal S6 protein-serine kinase 1                                            | 2104        | 739     | -1.09  | 1860        | 682     | -1.44        | <a href="#">Q15418</a> |
| 14         | 606            | PK061               | PAK1/2/3             | S144/S141/S15            | p21-activated kinase 1 (alpha) (serine/threonine-protein kinase PAK 1)          | 1177        | 429     | -1.03  | 1211        | 462     | -1.38        | <a href="#">Q13153</a> |
| 15         | 458            | NK227-2             | LKB1                 | Pan-specific             | Serine/threonine-protein kinase 11                                              | 22829       | 46279   | 1.17   | 35307       | 68527   | 1.28         | <a href="#">Q15831</a> |
| 16         | 763            | PK100               | RSK1/2               | S363/S369                | Ribosomal S6 protein-serine kinase 1/2                                          | 2153        | 4525    | 1.34   | 2402        | 4119    | 1.06         | <a href="#">Q15418</a> |
| 17         | 74             | NK156-4             | B-Raf                | Pan-specific             | RafB proto-oncogene-encoded protein-serine kinase                               | 20719       | 47428   | 1.39   | 25702       | 62781   | 1.79         | <a href="#">P15056</a> |
| 18         | 757            | NK163-3             | Ros                  | Pan-specific             | Orosomucoid 1 receptor-tyrosine kinase                                          | 26933       | 62397   | 1.40   | 29192       | 56437   | 1.28         | <a href="#">P08922</a> |
| 19         | 265            | NK055-2             | ERK1                 | Pan-specific             | Extracellular regulated protein-serine kinase 1 (p44 MAP kinase)                | 37157       | 88687   | 1.44   | 38943       | 80624   | 1.42         | <a href="#">P27361</a> |
| 20         | 847            | NK181-4             | TYK2                 | Pan-specific             | Protein-tyrosine kinase 2 (Jak-related)                                         | 27398       | 68594   | 1.54   | 43928       | 84730   | 1.26         | <a href="#">P29597</a> |
| 21         | 266            | NK055-3             | ERK1                 | Pan-specific             | Extracellular regulated protein-serine kinase 1 (p44 MAP kinase)                | 37206       | 94331   | 1.55   | 40478       | 84042   | 1.43         | <a href="#">P27361</a> |
| 22         | 456            | NK093               | LIMK1                | Pan-specific             | LIM domain kinase 1                                                             | 4188        | 10057   | 1.55   | 3537        | 10571   | 2.27         | <a href="#">P53667</a> |
| 23         | 474            | NK099-8             | MEK1                 | Pan-specific             | MAPK/ERK protein-serine kinase 1 (MKK1)                                         | 28486       | 71897   | 1.55   | 40417       | 80986   | 1.35         | <a href="#">Q02750</a> |
| 24         | 758            | NK163-4             | Ros                  | Pan-specific             | Orosomucoid 1 receptor-tyrosine kinase                                          | 26710       | 71085   | 1.65   | 31552       | 57335   | 1.14         | <a href="#">P08922</a> |
| 25         | 463            | PK044               | MAPKAPK2             | T222                     | Mitogen-activated protein kinase-activated protein kinase 2                     | 5182        | 14309   | 1.79   | 4498        | 11048   | 1.84         | <a href="#">P49137</a> |
| 26         | 460            | NK227-4             | LKB1                 | Pan-specific             | Serine/threonine-protein kinase 11                                              | 29746       | 88318   | 1.84   | 32026       | 71557   | 1.59         | <a href="#">Q15831</a> |
| 27         | 187            | PN190               | Cyclin B1            | S147                     | Cyclin B1                                                                       | 3137        | 10644   | 2.19   | 3702        | 10138   | 2.08         | <a href="#">P14635</a> |
| 28         | 79             | PN014               | BRCA1                | S1497                    | Breast cancer type 1 susceptibility protein                                     | 6499        | 24876   | 2.37   | 6507        | 20313   | 2.36         | <a href="#">P38398</a> |

**Supplemental Table V: Proteins that are specifically altered in CD151- CD4+ T cells in response to IL-2 stimulation.**

| Serial No. | Antibody Codes | Target Protein Name | Phospho Site (Human) | Full Target Protein Name | CD151-                                                                 | CD151- + IL-2 | Z-ratio | Uniprot Link |                        |
|------------|----------------|---------------------|----------------------|--------------------------|------------------------------------------------------------------------|---------------|---------|--------------|------------------------|
| 1          | 137            | NK026-7             | CDK2                 | Pan-specific             | Cyclin-dependent protein-serine kinase 2                               | 12506         | 2560    | -1.69        | <a href="#">P24941</a> |
| 2          | 154            | PK162               | Chk1                 | S280                     | Checkpoint protein-serine kinase 1                                     | 3220          | 875     | -1.36        | <a href="#">Q14757</a> |
| 3          | 728            | PN063               | Rac1/cdc42           | S71                      | Ras-related C3 botulinum toxin substrate 1                             | 627           | 185     | -1.24        | <a href="#">P63000</a> |
| 4          | 813            | NN105               | STAT5A               | Pan-specific             | Signal transducer and activator of transcription 5A                    | 21244         | 7007    | -1.21        | <a href="#">P42229</a> |
| 5          | 123            | NN023               | Cdc34                | Pan-specific             | Cell division cycle 34 (ubiquitin-conjugating ligase)                  | 3224          | 1037    | -1.19        | <a href="#">P49427</a> |
| 6          | 817            | NN108               | STI1                 | Pan-specific             | Stress induced phosphoprotein 1 (Hsc70/Hsp90 organizing protein (Hop)) | 1527          | 481     | -1.19        | <a href="#">P31948</a> |
| 7          | 695            | NP018               | PP2Cd                | Pan-specific             | Protein-serine phosphatase 2C - catalytic subunit - delta isoform      | 1136          | 364     | -1.17        | <a href="#">Q15297</a> |
| 8          | 513            | PK055-1             | Met                  | Y1230/Y1234/V            | Hepatocyte growth factor (HGF) receptor-tyrosine kinase                | 1384          | 451     | -1.15        | <a href="#">P08581</a> |
| 9          | 854            | PK133               | VEGFR2               | Y1214                    | Vascular endothelial growth factor receptor-tyrosine kinase 2 (Flk1)   | 1321          | 436     | -1.14        | <a href="#">P35968</a> |
| 10         | 47             | PN115               | ATF2                 | S94/S112                 | Activating transcription factor 2 (CRE-BP1)                            | 2146          | 727     | -1.13        | <a href="#">P15336</a> |
| 11         | 725            | PK097-3             | PYK2                 | Y579                     | Protein-tyrosine kinase 2                                              | 1538          | 516     | -1.13        | <a href="#">Q14289</a> |
| 12         | 58             | PN009               | B23 (NPM)            | T234/237                 | B23 (nucleophosmin, numatrin, nucleolar protein NO38)                  | 1682          | 586     | -1.09        | <a href="#">P06748</a> |
| 13         | 610            | NK200-2             | PAKγ                 | Pan-specific             | p21-activated kinase 2 (gamma) (serine/threonine-protein kinase PAK 2) | 11133         | 4059    | -1.09        | <a href="#">Q13177</a> |
| 14         | 132            | PK008-1             | CDK1/CDC2            | T161                     | Cyclin-dependent protein-serine kinase 1/2                             | 1167          | 424     | -1.04        | <a href="#">P06493</a> |
| 15         | 455            | PK041               | Lck                  | Y505                     | Lymphocyte-specific protein-tyrosine kinase                            | 2058          | 786     | -1.00        | <a href="#">P06239</a> |
| 16         | 652            | NK135               | PKCδ                 | Pan-specific             | Protein-serine kinase C delta                                          | 6982          | 12572   | 1.01         | <a href="#">Q05655</a> |
| 17         | 650            | PK075-2             | PKCβ1/2              | T500                     | Protein-serine kinase C beta 1/2                                       | 913           | 1597    | 1.04         | <a href="#">P05771</a> |
| 18         | 361            | PN041               | Hsp27                | S78                      | Heat shock 27 kDa protein beta 1 (HspB1)                               | 13085         | 24743   | 1.07         | <a href="#">P04792</a> |
| 19         | 175            | PN024               | CREB1                | S133                     | cAMP response element binding protein 1                                | 28402         | 55552   | 1.09         | <a href="#">P16220</a> |
| 20         | 765            | PK101-2             | RSK1/2               | S380/S386                | Ribosomal S6 protein-serine kinase 1/2                                 | 1831          | 3410    | 1.13         | <a href="#">Q15418</a> |
| 21         | 764            | PK100-2             | RSK1/2               | S363/S369                | Ribosomal S6 protein-serine kinase 1/2                                 | 1208          | 2262    | 1.15         | <a href="#">Q15418</a> |
| 22         | 93             | NK022               | CaMKK                | Pan-specific             | Calcium/calmodulin-dependent protein-serine kinase kinase              | 4886          | 9956    | 1.24         | <a href="#">Q8N5S9</a> |
| 23         | 203            | NP006-2             | DUSP1 (MKP1)         | Pan-specific             | MAP kinase phosphatase 1 (CL100, VH1)                                  | 30957         | 69448   | 1.34         | <a href="#">P28562</a> |
| 24         | 89             | NK019-2             | CAMK2δ               | Pan-specific             | Calcium/calmodulin-dependent protein-serine kinase 2 delta             | 2324          | 5252    | 1.46         | <a href="#">Q13557</a> |
| 25         | 364            | NN057-3             | Hsp40                | Pan-specific             | DnaJ homolog, subfamily B member 1                                     | 18087         | 42856   | 1.46         | <a href="#">P25685</a> |
| 26         | 852            | NN176               | VEGF-C               | Pan-specific             | Vascular endothelial growth factor C                                   | 5256          | 12440   | 1.51         | <a href="#">P49767</a> |
| 27         | 84             | PN015               | Caldesmon            | S789                     | Caldesmon                                                              | 3777          | 9038    | 1.55         | <a href="#">Q05682</a> |
| 28         | 647            | PK073               | PKCα                 | S657                     | Protein-serine kinase C alpha                                          | 3917          | 9721    | 1.61         | <a href="#">P17252</a> |
| 29         | 653            | PK079-1             | PKCδ                 | S645                     | Protein-serine kinase C delta                                          | 2709          | 6680    | 1.62         | <a href="#">Q05655</a> |

Supplemental Table VI: Proteins that are specifically altered in CD151+ CD4+ T cells in response to IL-2 stimulation

| Serial No. | Antibody Codes | Target Protein Name | Phospho Site (Human) | Full Target Protein Name | CD151+                                                                           | CD151+ +IL-2 | Z-ratio | Uniprot Link |                        |
|------------|----------------|---------------------|----------------------|--------------------------|----------------------------------------------------------------------------------|--------------|---------|--------------|------------------------|
| 1          | 312            | PN195               | FKHR                 | S319                     | Forkhead box protein O1                                                          | 531          | 85      | -2.54        | <a href="#">Q12778</a> |
| 2          | 245            | PN030-2             | eIF4E                | S209                     | Eukaryotic translation initiation factor 4 (mRNA cap binding protein)            | 1531         | 273     | -2.41        | <a href="#">P06730</a> |
| 3          | 709            | PN104               | Progesterone R       | S294                     | Progesterone receptor                                                            | 623          | 122     | -2.27        | <a href="#">P06401</a> |
| 4          | 137            | NK026-7             | CDK2                 | Pan-specific             | Cyclin-dependent protein-serine kinase 2                                         | 13424        | 3482    | -1.93        | <a href="#">P24941</a> |
| 5          | 534            | NK111               | Mnk2                 | Pan-specific             | MAP kinase-interacting protein-serine kinase 2 (calmodulin-activated)            | 3973         | 1139    | -1.78        | <a href="#">Q9H8H9</a> |
| 6          | 46             | PK143               | ASK1                 | S966                     | Apoptosis signal regulating protein-serine kinase 1                              | 722          | 206     | -1.76        | <a href="#">Q59GL6</a> |
| 7          | 248            | NN168               | Elk1                 | Pan-specific             | ETS domain-containing protein Elk-1                                              | 940          | 269     | -1.76        | <a href="#">P19419</a> |
| 8          | 97             | NN016               | Caspase 6            | Pan-specific             | Caspase 6 (apoptotic protease Mch2)                                              | 996          | 301     | -1.69        | <a href="#">P55212</a> |
| 9          | 439            | PN155               | Jun                  | Y170                     | Jun proto-oncogene-encoded AP1 transcription factor                              | 1458         | 455     | -1.65        | <a href="#">P05412</a> |
| 10         | 143            | NK028-5             | CDK5                 | Pan-specific             | Cyclin-dependent protein-serine kinase 5                                         | 14047        | 4821    | -1.55        | <a href="#">Q00535</a> |
| 11         | 147            | NK030-2             | CDK7                 | Pan-specific             | Cyclin-dependent protein-serine kinase 7                                         | 11993        | 4557    | -1.41        | <a href="#">P50613</a> |
| 12         | 548            | PN182               | MyoD                 | S200                     | Myoblast determination protein 1                                                 | 1038         | 394     | -1.38        | <a href="#">P15172</a> |
| 13         | 16             | NK129               | Akt1 (PKBa)          | Pan-specific             | RAC-alpha serine/threonine-protein kinase                                        | 8129         | 3229    | -1.35        | <a href="#">P31749</a> |
| 14         | 356            | NN055               | HSF4                 | Pan-specific             | Heat shock transcription factor 4                                                | 1272         | 501     | -1.33        | <a href="#">P84243</a> |
| 15         | 683            | PN144               | PLCg1                | Y783                     | 1-phosphatidylinositol-4,5-bisphosphate phosphodiesterase gamma-1                | 521          | 206     | -1.32        | <a href="#">P19174</a> |
| 16         | 829            | PN107               | Tau                  | S422                     | Microtubule-associated protein tau                                               | 2347         | 996     | -1.24        | <a href="#">P10636</a> |
| 17         | 409            | PN118               | IRS1                 | S639                     | Insulin receptor substrate 1                                                     | 1455         | 619     | -1.23        | <a href="#">P35568</a> |
| 18         | 451            | NK092-3             | Lck                  | Pan-specific             | Lymphocyte-specific protein-tyrosine kinase                                      | 985          | 421     | -1.22        | <a href="#">P06239</a> |
| 19         | 183            | NK044               | Csk                  | Pan-specific             | C-terminus of Src tyrosine kinase                                                | 2111         | 911     | -1.22        | <a href="#">P41240</a> |
| 20         | 860            | NP030               | VHR                  | Pan-specific             | Dual specificity protein phosphatase 3                                           | 1452         | 626     | -1.21        | <a href="#">P51452</a> |
| 21         | 63             | NN006               | Bcl2                 | Pan-specific             | B-cell lymphoma protein 2 alpha                                                  | 1830         | 803     | -1.19        | <a href="#">P10415</a> |
| 22         | 560            | NK207               | NIK                  | Pan-specific             | NF-kappa beta-inducing kinase                                                    | 6037         | 2726    | -1.17        | <a href="#">Q99558</a> |
| 23         | 193            | PN026               | Dab1                 | Y198                     | Disabled homolog 1                                                               | 2018         | 925     | -1.13        | <a href="#">Q75853</a> |
| 24         | 824            | NK175-5             | TAK1                 | Pan-specific             | TGF-beta-activated protein-serine kinase 1                                       | 10455        | 4977    | -1.10        | <a href="#">Q43318</a> |
| 25         | 126            | NK025-1             | CDK1                 | Pan-specific             | Cyclin-dependent protein-serine kinase 1                                         | 30090        | 14525   | -1.10        | <a href="#">P06493</a> |
| 26         | 497            | NK104               | MEK5                 | Pan-specific             | MAPK/ERK protein-serine kinase 5 (MKK5)                                          | 4343         | 2083    | -1.08        | <a href="#">Q13163</a> |
| 27         | 538            | NK113-2             | MTS1                 | Pan-specific             | Mammalian STE20-like protein-serine kinase 1 (KRS2)                              | 949          | 451     | -1.08        | <a href="#">Q13043</a> |
| 28         | 7              | NK001               | Abl                  | Pan-specific             | Abelson proto-oncogene-encoded protein-tyrosine kinase                           | 1663         | 806     | -1.05        | <a href="#">P00519</a> |
| 29         | 311            | PN194               | FKHR                 | S256                     | Forkhead box protein O1                                                          | 707          | 340     | -1.05        | <a href="#">Q12778</a> |
| 30         | 681            | PK132               | PKR1                 | T446                     | Double-stranded RNA-dependent protein-serine kinase                              | 780          | 382     | -1.03        | <a href="#">P19525</a> |
| 31         | 871            | NK186-2             | Yes                  | Pan-specific             | Yamaguchi sarcoma proto-oncogene-encoded tyrosine kinase                         | 379          | 185     | -1.03        | <a href="#">P07947</a> |
| 32         | 632            | NN181-1             | PKD3                 | Pan-specific             | Pyruvate dehydrogenase kinase isoform 3                                          | 1968         | 975     | -1.03        | <a href="#">Q15120</a> |
| 33         | 766            | PK102               | RSK1/2/3             | T573                     | Ribosomal S6 protein-serine kinase 1/2/3                                         | 560          | 276     | -1.02        | <a href="#">Q15418</a> |
| 34         | 430            | NK088-2             | JNK2                 | Pan-specific             | Jun N-terminus protein-serine kinase (stress-activated protein kinase (SAPK)) 1  | 8767         | 4451    | -1.01        | <a href="#">P45983</a> |
| 35         | 92             | NK211               | CamK1                | Pan-specific             | Calcium/calmodulin-dependent protein-serine kinase 1 alpha                       | 5566         | 2848    | -1.00        | <a href="#">Q14012</a> |
| 36         | 868            | NK254-1             | WNK3                 | Pan-specific             | Serine/threonine-protein kinase WNK3                                             | 28779        | 49415   | 1.02         | <a href="#">Q9BY77</a> |
| 37         | 532            | NN132               | mMOB1                | Pan-specific             | Preimplantation protein 3                                                        | 24995        | 42906   | 1.02         | <a href="#">Q9Y3A3</a> |
| 38         | 259            | NK231-2             | ErbB3                | Pan-specific             | Tyrosine kinase-type cell surface receptor HER3                                  | 38191        | 66123   | 1.03         | <a href="#">P21860</a> |
| 39         | 544            | NK116-4             | mTOR                 | Pan-specific             | Mammalian target of rapamycin (FRAP)                                             | 30321        | 52429   | 1.03         | <a href="#">P42345</a> |
| 40         | 255            | NK054-4             | ErbB2                | Pan-specific             | ErbB2 (Neu) receptor-tyrosine kinase                                             | 46335        | 80475   | 1.03         | <a href="#">P04626</a> |
| 41         | 466            | PN050-1             | MARCKS               | S152/S156                | Myristoylated alanine-rich protein kinase C substrate                            | 639          | 1068    | 1.03         | <a href="#">P29966</a> |
| 42         | 358            | NN152-1             | Hsp25                | Pan-specific             | Heat shock 27 kDa protein beta 1 (HspB1)                                         | 24508        | 42718   | 1.05         | <a href="#">P84243</a> |
| 43         | 771            | PN161               | Shc1                 | Y349                     | SH2 domain-containing transforming protein 1                                     | 319          | 536     | 1.06         | <a href="#">P29353</a> |
| 44         | 678            | NK203               | PKG1b-NT             | Pan-specific             | cGMP-dependent protein kinase 1, beta isozyme                                    | 3440         | 5927    | 1.07         | <a href="#">P14619</a> |
| 45         | 836            | PK829               | TEC                  | Y519                     | Tyrosine-protein kinase Tec                                                      | 23469        | 41664   | 1.09         | <a href="#">P42680</a> |
| 46         | 525            | NK105-5             | MKK6                 | Pan-specific             | MAPK/ERK protein-serine kinase 6 (MKK6)                                          | 27201        | 48394   | 1.10         | <a href="#">P52564</a> |
| 47         | 706            | NK048-6             | PRKDC (DNAP          | Pan-specific             | DNA-activated protein-serine kinase                                              | 33582        | 60844   | 1.13         | <a href="#">P78527</a> |
| 48         | 301            | NK061               | Fes                  | Pan-specific             | Fes/Fps protein-tyrosine kinase                                                  | 3149         | 5586    | 1.13         | <a href="#">P07332</a> |
| 49         | 167            | PN020               | Cofilin 2            | S3                       | Cofilin 2                                                                        | 9922         | 17790   | 1.13         | <a href="#">Q9Y281</a> |
| 50         | 855            | NK226-2             | VGFR1                | Pan-specific             | Vascular endothelial growth factor receptor 1                                    | 36700        | 68662   | 1.14         | <a href="#">P17948</a> |
| 51         | 332            | NN049               | Gp94                 | Pan-specific             | Glucose regulated protein 94 (endoplasmic)                                       | 31855        | 58268   | 1.15         | <a href="#">P14625</a> |
| 52         | 520            | NK103-4             | MKK4                 | Pan-specific             | MAPK/ERK protein-serine kinase 4 (MKK4)                                          | 29498        | 54033   | 1.16         | <a href="#">P45985</a> |
| 53         | 786            | PN125               | SMC1                 | S957                     | Structural maintenance of chromosomes protein 1A                                 | 11481        | 20862   | 1.16         | <a href="#">Q14683</a> |
| 54         | 577            | PK739               | p38a MAPK            | T180+pY182               | Mitogen-activated protein-serine kinase p38 alpha                                | 5450         | 9842    | 1.16         | <a href="#">Q16539</a> |
| 55         | 442            | NK241-2             | Kit                  | Pan-specific             | Mast/stem cell growth factor receptor Kit                                        | 29913        | 55164   | 1.17         | <a href="#">P10721</a> |
| 56         | 298            | PK629               | FAK                  | Y577                     | Focal adhesion protein-tyrosine kinase                                           | 3241         | 5914    | 1.19         | <a href="#">Q05397</a> |
| 57         | 633            | NN181-2             | PKD3                 | Pan-specific             | Pyruvate dehydrogenase kinase isoform 3                                          | 30625        | 57664   | 1.22         | <a href="#">Q15120</a> |
| 58         | 799            | NK172-2             | Src                  | Pan-specific             | Src proto-oncogene-encoded protein-tyrosine kinase                               | 26954        | 50923   | 1.23         | <a href="#">P12931</a> |
| 59         | 699            | NN021               | PP5/PPT              | Pan-specific             | Protein-serine phosphatase 5 - catalytic subunit (PPT)                           | 388          | 716     | 1.26         | <a href="#">P53041</a> |
| 60         | 83             | NN174               | CA9                  | Pan-specific             | Carbonic anhydrase 9                                                             | 5178         | 9838    | 1.27         | <a href="#">Q16790</a> |
| 61         | 277            | NK056-4             | ERK2                 | Pan-specific             | Extracellular regulated protein-serine kinase 2 (p42 MAP kinase)                 | 32595        | 63025   | 1.27         | <a href="#">P28482</a> |
| 62         | 368            | NN059-3             | Hsp60                | Pan-specific             | Heat shock 60 kDa protein 1 (chaperonin, CPN60)                                  | 9800         | 18844   | 1.29         | <a href="#">P10809</a> |
| 63         | 563            | PN054               | NMDAR2B              | Y1472                    | N-methyl-D-aspartate (NMDA) glutamate receptor 2B subunit                        | 586          | 1106    | 1.30         | <a href="#">Q13224</a> |
| 64         | 302            | NK062-3             | FGFR1                | Pan-specific             | Fibroblast growth factor receptor-tyrosine kinase 1                              | 28267        | 55439   | 1.31         | <a href="#">P11362</a> |
| 65         | 718            | NP024               | PTP1B                | Pan-specific             | Protein-tyrosine phosphatase 1B                                                  | 912          | 1748    | 1.33         | <a href="#">P18031</a> |
| 66         | 647            | PK073               | PKCa                 | S657                     | Protein-serine kinase C alpha                                                    | 7650         | 15060   | 1.34         | <a href="#">P17252</a> |
| 67         | 835            | PK828               | TBK1                 | S172                     | Serine/threonine-protein kinase TBK1                                             | 30807        | 62174   | 1.37         | <a href="#">Q9UHD2</a> |
| 68         | 524            | NK105-4             | MKK6                 | Pan-specific             | MAPK/ERK protein-serine kinase 6 (MKK6)                                          | 23036        | 46473   | 1.37         | <a href="#">P52564</a> |
| 69         | 395            | PK154               | IKKa                 | T23                      | Inhibitor of NF-kappa-B protein-serine kinase alpha (CHUK)                       | 864          | 1698    | 1.38         | <a href="#">O15111</a> |
| 70         | 331            | NN048-2             | Gp78                 | Pan-specific             | Glucose regulated protein 78                                                     | 22110        | 44787   | 1.38         | <a href="#">P11021</a> |
| 71         | 113            | NP038-1             | Cdc25A               | Pan-specific             | Cell division cycle 25A phosphatase                                              | 26893        | 54702   | 1.39         | <a href="#">P30304</a> |
| 72         | 473            | NK099-7             | MEK1                 | Pan-specific             | MAPK/ERK protein-serine kinase 1 (MKK1)                                          | 33131        | 68328   | 1.42         | <a href="#">Q02750</a> |
| 73         | 39             | NK205-4             | A-Raf                | Pan-specific             | A-Raf proto-oncogene serine/threonine-protein kinase                             | 42433        | 87803   | 1.42         | <a href="#">P10398</a> |
| 74         | 521            | NK103-5             | MKK4                 | Pan-specific             | MAPK/ERK protein-serine kinase 4 (MKK4)                                          | 31722        | 65589   | 1.42         | <a href="#">P45985</a> |
| 75         | 273            | NK055-NK056-2       | ERK1/2               | Pan-specific             | Extracellular regulated protein-serine kinase 1 (p44 MAP kinase) + Extracellular | 28097        | 58082   | 1.42         | <a href="#">P27361</a> |
| 76         | 275            | PK168-PK169         | ERK1/2               | Y204+Y187                | Extracellular regulated protein-serine kinase 1 (p44 MAP kinase) + Extracellular | 3650         | 7407    | 1.42         | <a href="#">P27361</a> |
| 77         | 865            | NK252-1             | WNK1                 | Pan-specific             | Serine/threonine-protein kinase WNK1                                             | 29843        | 70659   | 1.72         | <a href="#">Q9H4A3</a> |
| 78         | 586            | NK059-1             | p38g MAPK            | Pan-specific             | Mitogen-activated protein-serine kinase p38 gamma (MAPK12)                       | 6862         | 16293   | 1.76         | <a href="#">P53778</a> |
| 79         | 377            | NN063               | HspBP1               | Pan-specific             | Hsp70 binding protein 1                                                          | 4279         | 11476   | 2.03         | <a href="#">O95351</a> |
| 80         | 669            | PK087               | PKCi                 | T555/T563                | Protein-serine kinase C lambda/iota                                              | 1091         | 2922    | 2.06         | <a href="#">P41743</a> |
| 81         | 802            | PK107               | Src                  | Y418                     | Src proto-oncogene-encoded protein-tyrosine kinase                               | 754          | 2711    | 2.71         | <a href="#">P12931</a> |

Supplemental Table VII: Proteins that are altered in Jurkat T cells by CD151 overexpression.

| Target Protein Name | Phospho Site (Human) | Full Target Protein Name                                                                   | Jurkat | J-CD151 | Z-ratio | Uniprot Link           | Phosphorylation | MAPK cascade | Cell death | Cell proliferation |
|---------------------|----------------------|--------------------------------------------------------------------------------------------|--------|---------|---------|------------------------|-----------------|--------------|------------|--------------------|
| 1 NFkB p65          | S529                 | NF-kappa-B p65 nuclear transcription factor                                                | 879    | 1791    | 1.00    | <a href="#">Q04206</a> |                 |              |            |                    |
| 2 Yes               | Pan-specific         | Yamaguchi sarcoma proto-oncogene-encoded tyrosine kinase                                   | 813    | 1698    | 1.04    | <a href="#">P07947</a> |                 |              |            |                    |
| 3 Hsp60             | Pan-specific         | Heat shock 60 kDa protein 1 (chaperonin, CPN60)                                            | 1896   | 4145    | 1.05    | <a href="#">P10809</a> |                 |              |            |                    |
| 4 Myc               | S373                 | Myc proto-oncogene protein                                                                 | 1118   | 2419    | 1.07    | <a href="#">P01106</a> |                 |              |            |                    |
| 5 Cofilin           | Pan-specific         | Cofilin 1                                                                                  | 1103   | 2385    | 1.07    | <a href="#">P23528</a> |                 |              |            |                    |
| 6 eIF2a             | Pan-specific         | Eukaryotic translation initiation factor 2 alpha                                           | 1073   | 2332    | 1.08    | <a href="#">P05198</a> |                 |              |            |                    |
| 7 PTP1C             | Pan-specific         | Protein-tyrosine phosphatase 1C (SHP1, SHPTP1)                                             | 1347   | 2982    | 1.09    | <a href="#">P29350</a> |                 |              |            |                    |
| 8 GluR1             | S849                 | Glutamate receptor 1                                                                       | 2235   | 5067    | 1.09    | <a href="#">P42261</a> |                 |              |            |                    |
| 9 PP2Cd             | Pan-specific         | Protein-serine phosphatase 2C - catalytic subunit - delta isoform                          | 987    | 2166    | 1.09    | <a href="#">Q15297</a> |                 |              |            |                    |
| 10 PTEN             | S380/T382/T383       | Phosphatidylinositol-3-OH kinase class I gamma 3 phosphatase and protein phosphatase alpha | 1195   | 2674    | 1.11    | <a href="#">P60484</a> |                 |              |            |                    |
| 11 Histone H2A.X    | S139                 | Histone H2A variant X                                                                      | 622    | 1356    | 1.11    | <a href="#">P16104</a> |                 |              |            |                    |
| 12 CDK1/2           | Y15                  | Cyclin-dependent protein-serine kinase 1/2                                                 | 711    | 1568    | 1.12    | <a href="#">P06493</a> |                 |              |            |                    |
| 13 c-Cbl            | Y700                 | Signal transduction protein CBL                                                            | 853    | 1897    | 1.12    | <a href="#">P22681</a> |                 |              |            |                    |
| 14 Gab1             | Y627                 | GRB2-associated binder 1                                                                   | 648    | 1453    | 1.15    | <a href="#">Q13480</a> |                 |              |            |                    |
| 15 MKP2             | Pan-specific         | MAP kinase phosphatase 2 (VH2)                                                             | 855    | 1943    | 1.15    | <a href="#">Q13115</a> |                 |              |            |                    |
| 16 PSD-95           | Pan-specific         | Disks large homolog 4                                                                      | 836    | 1988    | 1.22    | <a href="#">P78352</a> |                 |              |            |                    |
| 17 eIF4E            | S209                 | Eukaryotic translation initiation factor 4 (mRNA cap binding protein)                      | 1116   | 2696    | 1.22    | <a href="#">P06730</a> |                 |              |            |                    |
| 18 PKR1             | T446                 | Double-stranded RNA-dependent protein-serine kinase                                        | 1161   | 2811    | 1.22    | <a href="#">P19525</a> |                 |              |            |                    |
| 19 PLCg2            | Y753                 | 1-phosphatidylinositol-4,5-bisphosphate phosphodiesterase gamma-2                          | 1181   | 2875    | 1.23    | <a href="#">P16885</a> |                 |              |            |                    |
| 20 CDK1/CDC2        | T161                 | Cyclin-dependent protein-serine kinase 1/2                                                 | 547    | 1303    | 1.24    | <a href="#">P06493</a> |                 |              |            |                    |
| 21 Akt1 (PKBa)      | S473                 | RAC-alpha serine/threonine-protein kinase                                                  | 2076   | 5250    | 1.25    | <a href="#">P31749</a> |                 |              |            |                    |
| 22 GNB2L1           | Pan-specific         | Guanine nucleotide-binding protein beta (receptor for activated C kinase 1 (RACK1))        | 1923   | 4880    | 1.26    | <a href="#">P63244</a> |                 |              |            |                    |
| 23 RIP2/RICK        | Pan-specific         | Receptor-interacting serine/threonine-protein kinase 2 (RIPK2)                             | 1123   | 2803    | 1.26    | <a href="#">Q43353</a> |                 |              |            |                    |
| 24 HDAC4/5/9        | S246/259/220         | Histone deacetylase 4                                                                      | 980    | 2616    | 1.36    | <a href="#">P56524</a> |                 |              |            |                    |
| 25 MyoD             | S200                 | Myoblast determination protein 1                                                           | 665    | 1805    | 1.41    | <a href="#">P15172</a> |                 |              |            |                    |
| 26 LAR              | Pan-specific         | LCA antigen-related (LAR) receptor tyrosine phosphatase                                    | 624    | 1695    | 1.42    | <a href="#">P10586</a> |                 |              |            |                    |
| 27 Caspase 7        | Pan-specific         | Caspase 7 (ICE-like apoptotic protease 3 (ICE-LAP3), Mch3)                                 | 1797   | 5136    | 1.42    | <a href="#">P55210</a> |                 |              |            |                    |
| 28 PKA R2a (PKR)    | S98                  | cAMP-dependent protein-serine kinase regulatory type 2 subunit alpha                       | 1183   | 3419    | 1.46    | <a href="#">P13861</a> |                 |              |            |                    |
| 29 MYPT1            | T696                 | Myosin phosphatase target 1                                                                | 1259   | 3694    | 1.48    | <a href="#">Q14974</a> |                 |              |            |                    |
| 30 IRS1             | S312                 | Insulin receptor substrate 1                                                               | 963    | 2930    | 1.55    | <a href="#">P35568</a> |                 |              |            |                    |
| 31 Tau              | T205                 | Microtubule-associated protein tau                                                         | 909    | 2887    | 1.61    | <a href="#">P10636</a> |                 |              |            |                    |
| 32 p70 S6K          | S424                 | Ribosomal protein S6 kinase beta-1                                                         | 974    | 3240    | 1.67    | <a href="#">P23443</a> |                 |              |            |                    |
| 33 Shc1             | Y349                 | SH2 domain-containing transforming protein 1                                               | 556    | 1818    | 1.68    | <a href="#">P29353</a> |                 |              |            |                    |
| 34 MEK6             | Pan-specific         | MAPK/ERK protein-serine kinase 6 (MKK6)                                                    | 311    | 1076    | 1.79    | <a href="#">P52564</a> |                 |              |            |                    |
| 35 FKHR             | S319                 | Forkhead box protein O1                                                                    | 406    | 1430    | 1.80    | <a href="#">Q12778</a> |                 |              |            |                    |
| 36 IKKa             | T23                  | Inhibitor of NF-kappa-B protein-serine kinase alpha (CHUK)                                 | 898    | 3273    | 1.80    | <a href="#">Q15111</a> |                 |              |            |                    |
| 37 Rb               | S780                 | Retinoblastoma-associated protein 1                                                        | 586    | 2124    | 1.82    | <a href="#">P06400</a> |                 |              |            |                    |
| 38 S6               | S235                 | 40S ribosomal protein S6                                                                   | 1639   | 6498    | 1.88    | <a href="#">P62753</a> |                 |              |            |                    |
| 39 4E-BP1           | Pan-specific         | Eukaryotic translation initiation factor 4E binding protein 1 (PHAS1)                      | 1150   | 4501    | 1.88    | <a href="#">Q13541</a> |                 |              |            |                    |
| 40 IRS1             | S639                 | Insulin receptor substrate 1                                                               | 620    | 2365    | 1.88    | <a href="#">P35568</a> |                 |              |            |                    |
| 41 4E-BP1           | T45                  | Eukaryotic translation initiation factor 4E binding protein 1 (PHAS1)                      | 949    | 3731    | 1.90    | <a href="#">Q13541</a> |                 |              |            |                    |
| 42 STAT2            | Y689                 | Signal transducer and activator of transcription 2                                         | 504    | 1997    | 1.95    | <a href="#">P52630</a> |                 |              |            |                    |
| 43 Catenin a        | S641                 | Catenin (cadherin-associated protein) alpha                                                | 663    | 2691    | 1.97    | <a href="#">P35221</a> |                 |              |            |                    |
| 44 PLCg1            | Y783                 | 1-phosphatidylinositol-4,5-bisphosphate phosphodiesterase gamma-1                          | 747    | 3132    | 2.00    | <a href="#">P19174</a> |                 |              |            |                    |
| 45 JAK1             | Y1022                | Janus protein-tyrosine kinase 1                                                            | 582    | 2565    | 2.09    | <a href="#">P23458</a> |                 |              |            |                    |
| 46 EGFR             | Y1197                | Epidermal growth factor receptor-tyrosine kinase                                           | 712    | 3642    | 2.28    | <a href="#">P00533</a> |                 |              |            |                    |
| 47 BCL              | Pan-specific         | B-cell lymphoma protein 2 alpha                                                            | 195    | 1384    | 2.80    | <a href="#">P10415</a> |                 |              |            |                    |
